# Supplementary material for: Pluripotent Stem Cell-Derived Hepatocytes Inhibit T Cell Proliferation In Vitro through Tryptophan Starvation
Source: MDPI journal article supplement (doi:10.3390/cells11010024), 2021-12-22
Supplement: s1 [file s1]

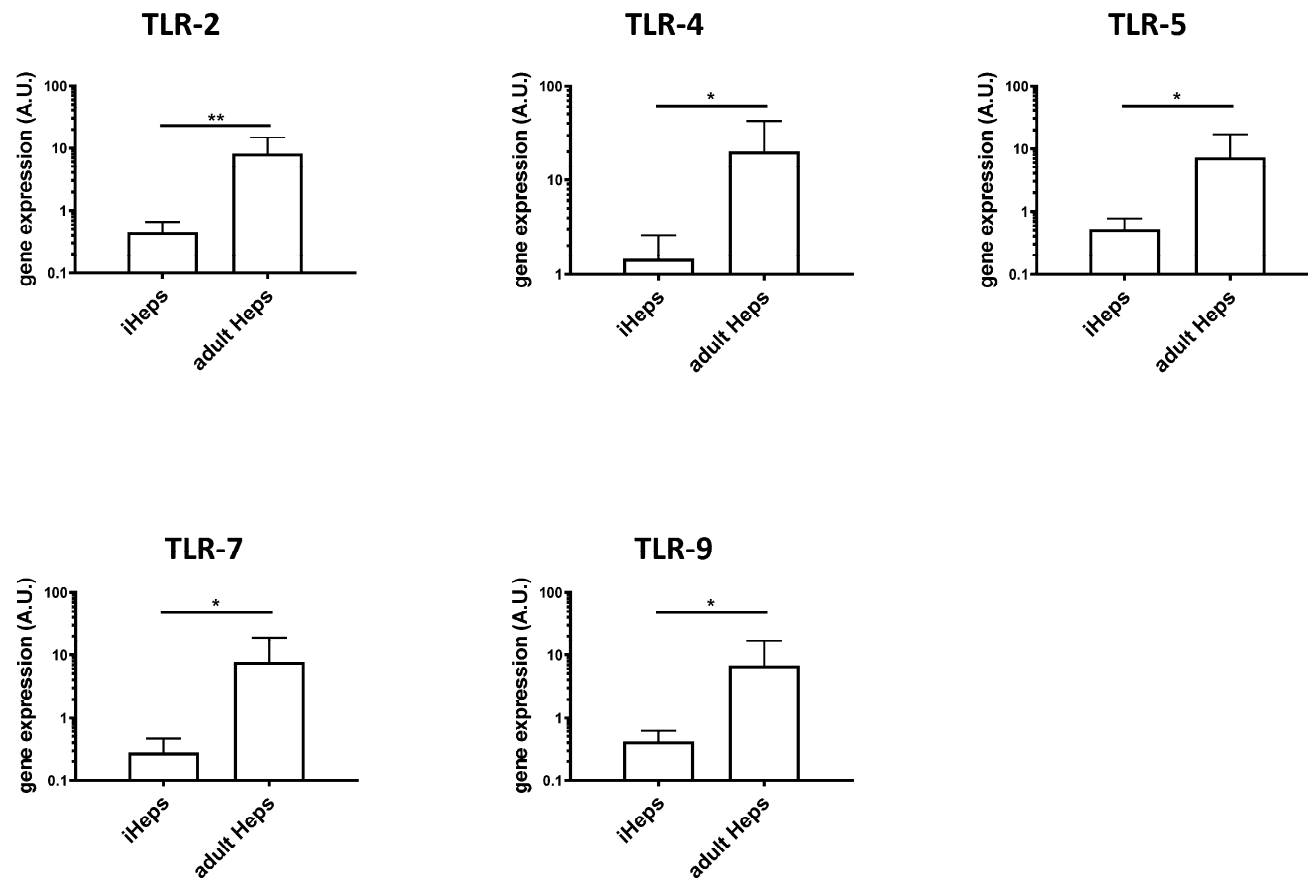

Figure S1: TLR-2, -4, -5, -7, -9 gene expression in HLCs and adult hepatocytes (Heps) evaluated by RT-PCR.

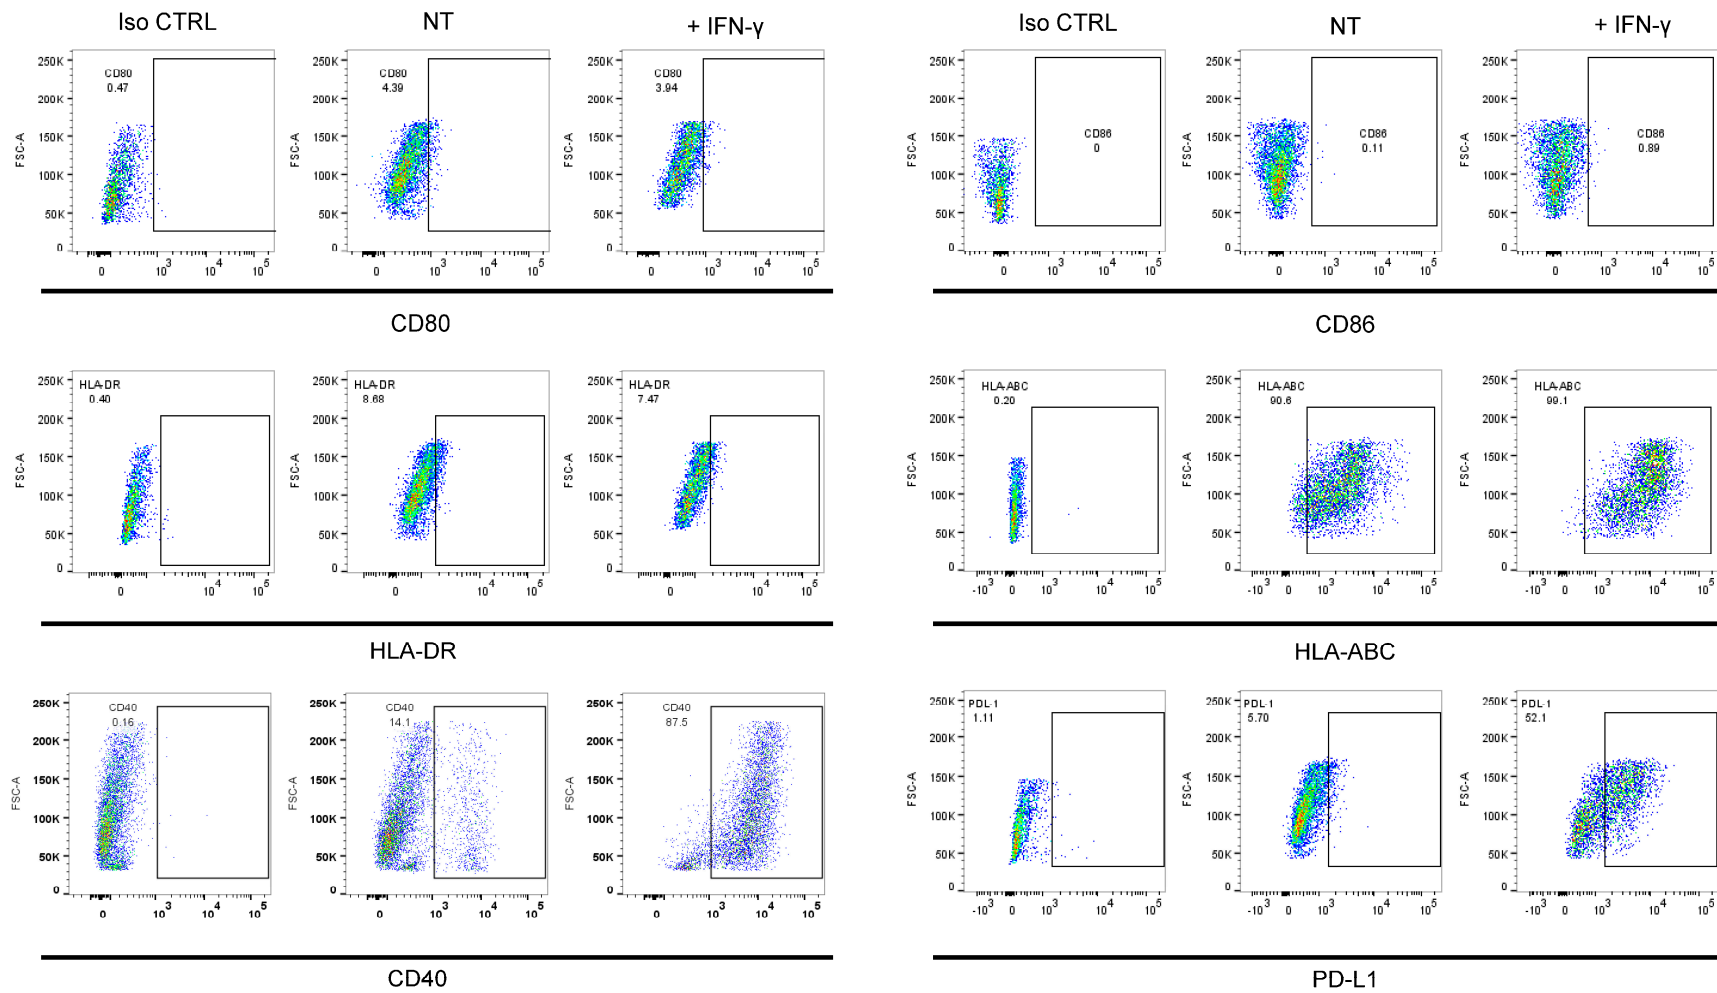

Figure S2: Representative dot plots showing the expression of the indicated markers in NT and INF- $\gamma$ -pre-treated HLCs.

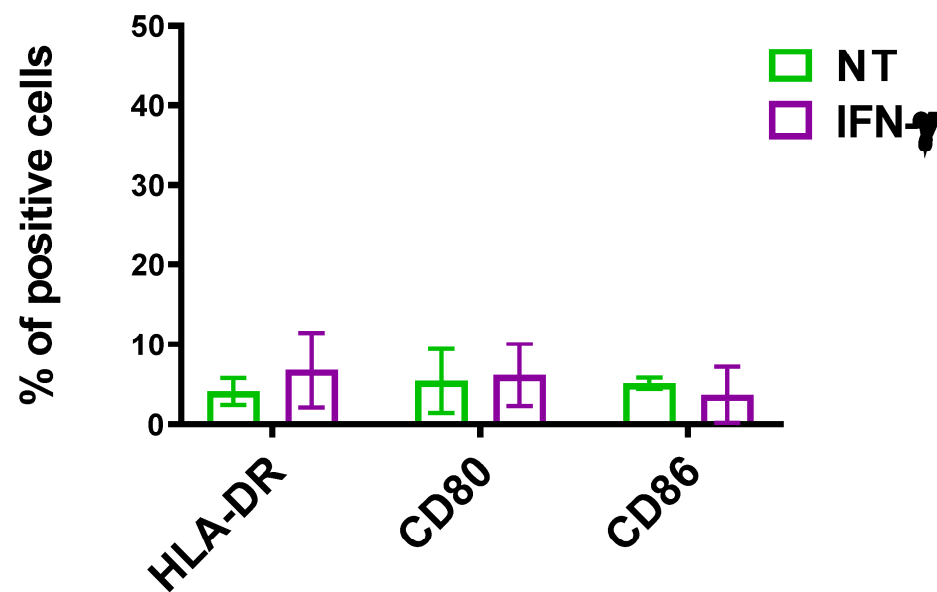

Figure S3: Expression of CD80, CD86 and HLA-DR in NT and IFN- $\gamma$ -pre-treated HLCs. Data are expressed as mean  $\pm$ SD of 6 independent experiments with one donor per experiment.

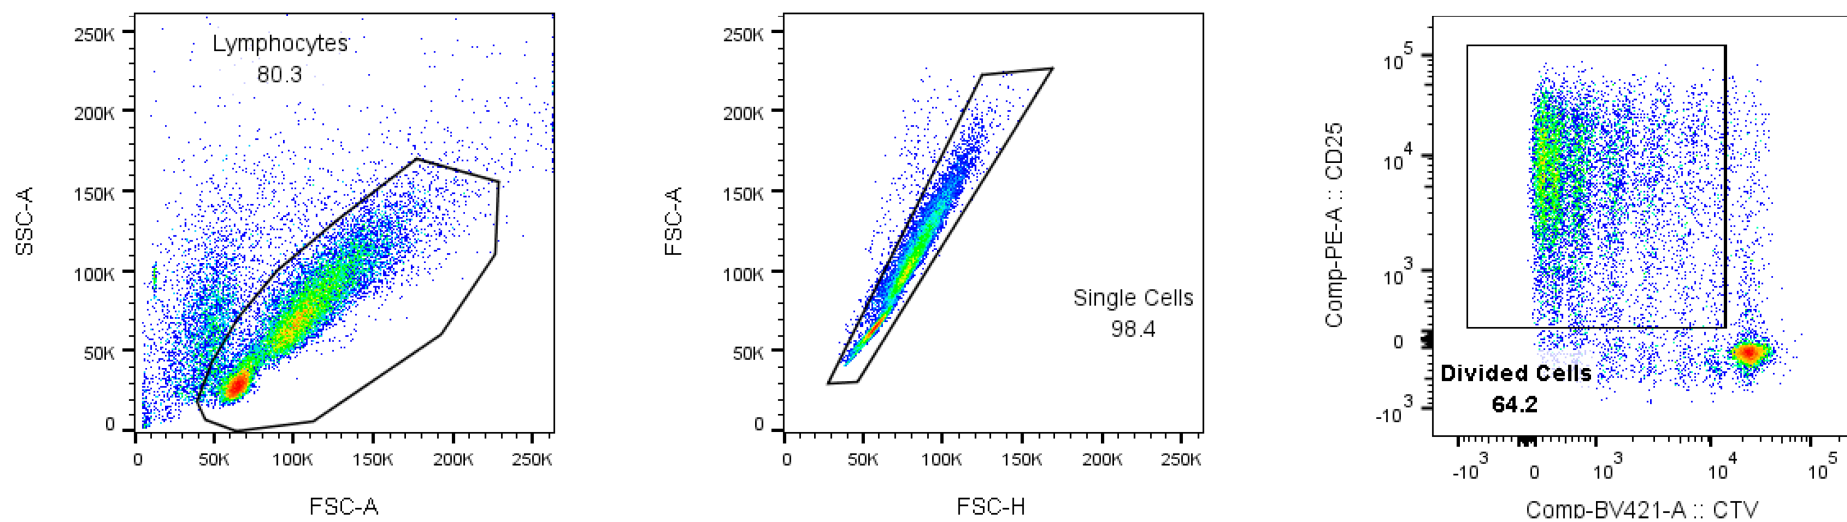

Figure S4: Gating strategy used to evaluate the % of divided cells.

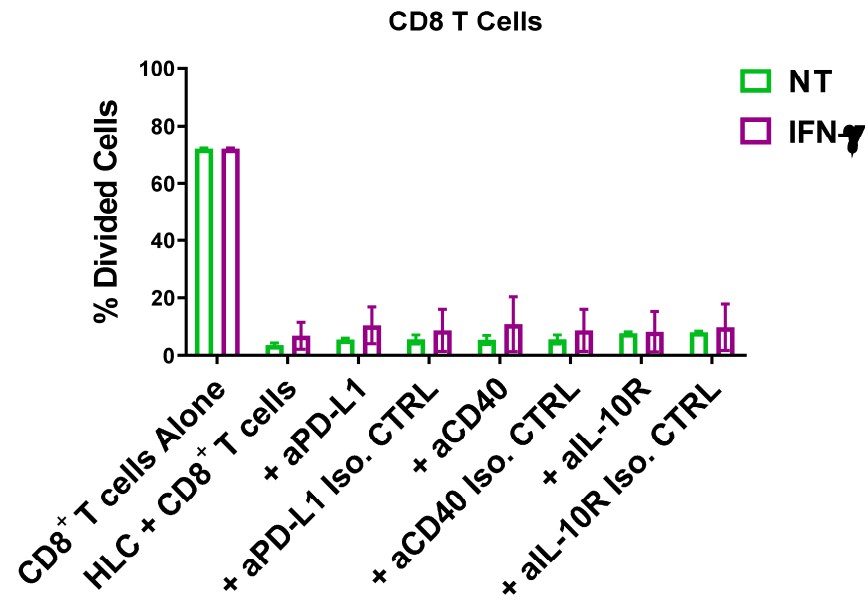

Figure S5: Quantification for percentage of divided CD8-T cells activated with  $\alpha$ CD3/CD28 beads and co-cultured with HLCs in the presence of  $\alpha$ PD-L1,  $\alpha$ CD40 or  $\alpha$ IL-10R. Data are expressed as mean  $\pm$ SD of 3 independent experiments, with one donor per experiment, in duplicate.

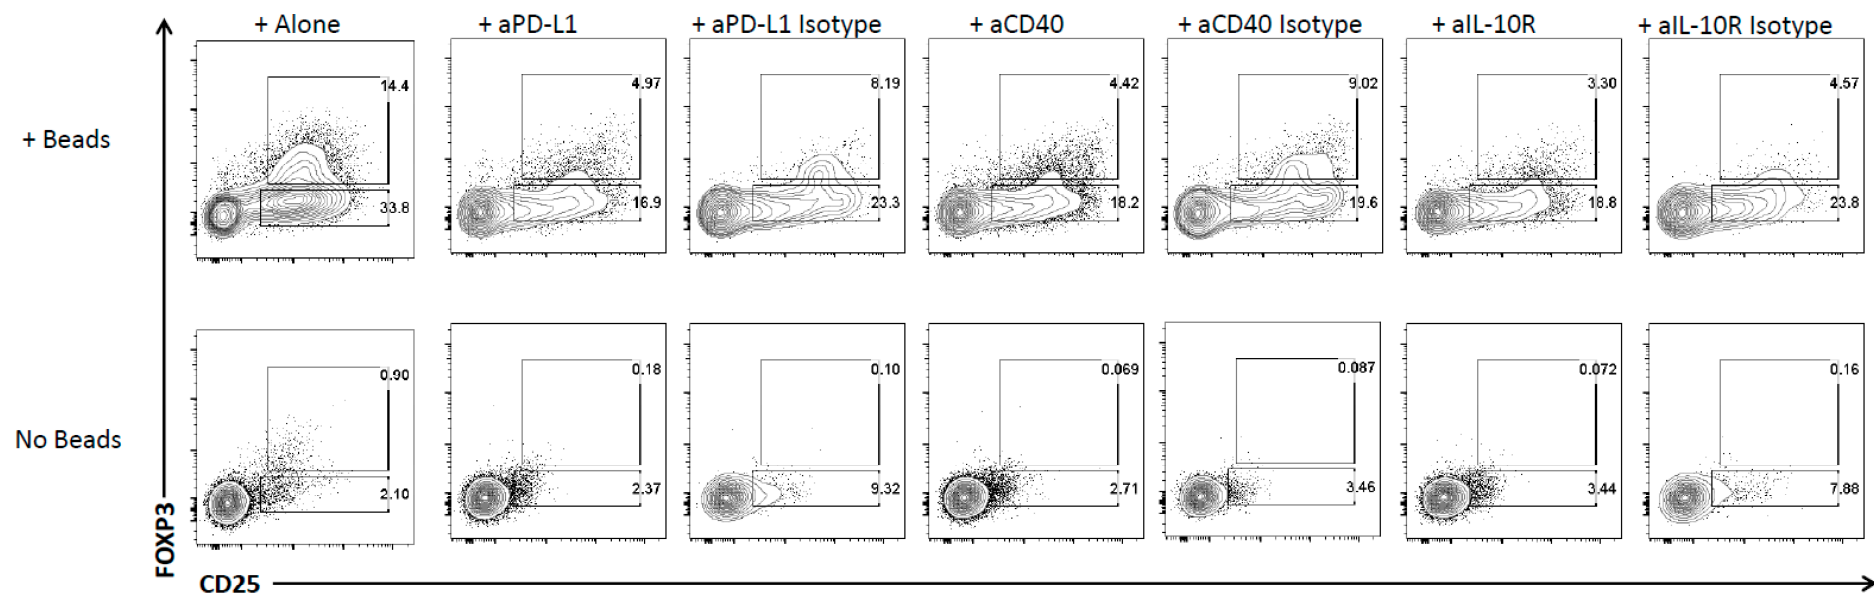

Figure S6: Representative dot plots of FoxP3 expression in CD4<sup>+</sup> cells activated with  $\alpha$ CD3/CD28 beads and co-cultured with HLCs in the presence of  $\alpha$ PD-L1,  $\alpha$ CD40 or  $\alpha$ IL-10R and the cognate isotype controls.
